# Supplementary material for: Complex from ionic β-cyclodextrin polyrotaxane and sodium tetraphenylthiophenesulfonate: restricted molecular rotation and aggregation-enhanced emission
Source: Royal Society of Chemistry journal article supplement (doi:10.1039/c4ra16913a), 2015-01-01
Supplement: c4ra16913a1.pdf [file c4ra16913a1.pdf]

**Supporting information**

**Complex from Ionic  $\beta$ -Cyclodextrin Polyrotaxane and Sodium  
Tetraphenylthiophenesulfonate: Restricted Molecular Rotation and  
Aggregation-Enhanced Emission**

Shiang-Lin Deng, Po-Chiao Huang, Li-Yang Lin, Deng-Jie Yang, and Jin-Long  
Hong\*

National Sun Yat-Sen University, Department of Materials and Optoelectronic Science  
Kaohsiung 80424, Taiwan

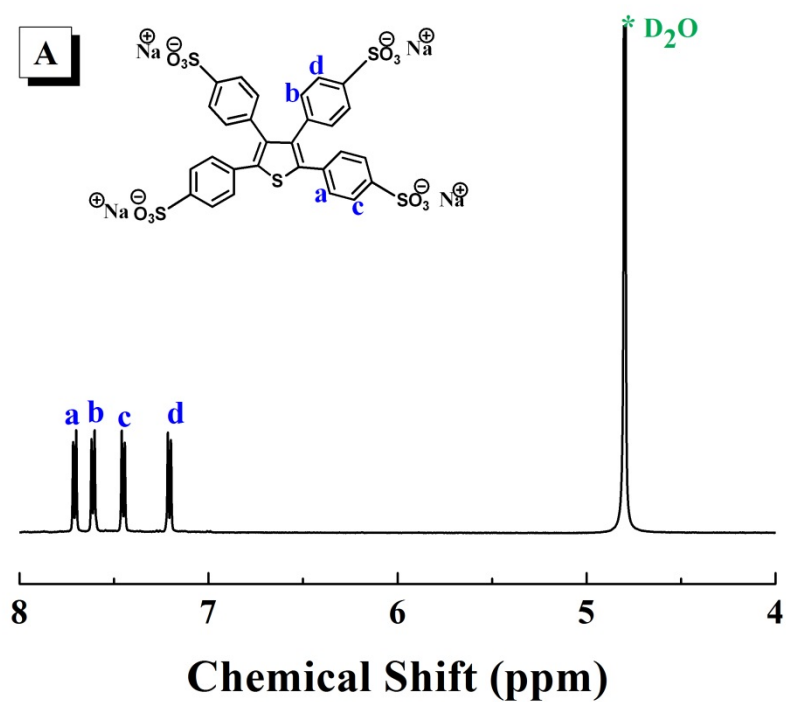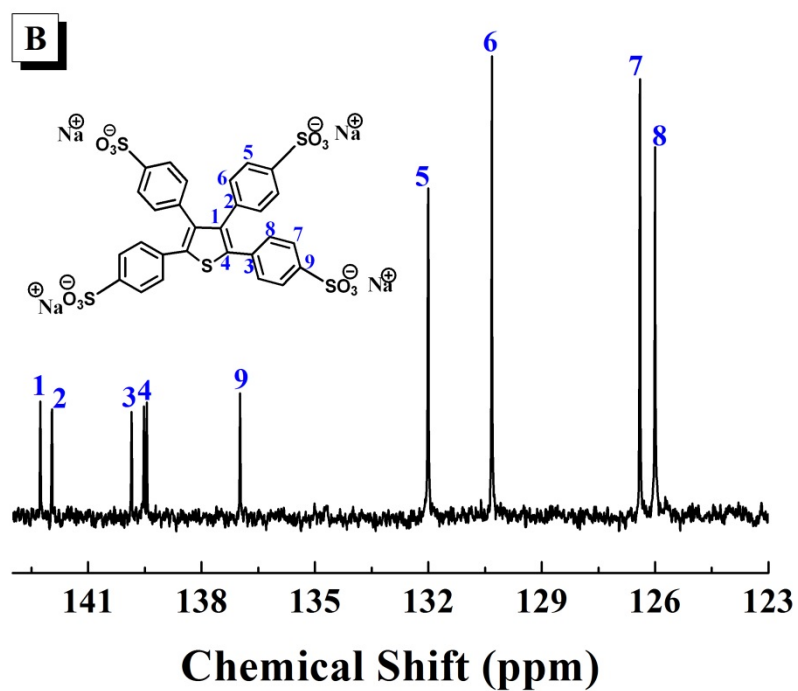

**Figure S1** (A)  $^1\text{H}$  and (B)  $^{13}\text{C}$  NMR spectra of TPS ( $\text{D}_2\text{O}$ ).

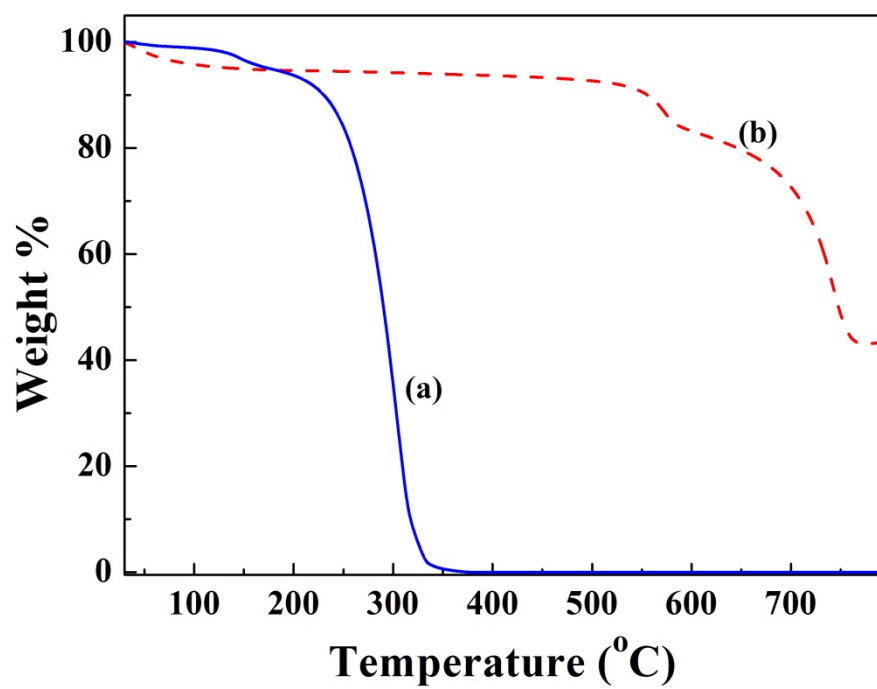

**Figure S2** TGA curves obtained at a heating rate of 10 °C/min under nitrogen atmosphere for (a) TP (b) TPS.
